# Supplementary material for: Antifouling hydrogel-coated magnetic nanoparticles for selective isolation and recovery of circulating tumor cells
Source: Royal Society of Chemistry journal article supplement (doi:10.1039/d0tb02380a), 2020-12-10
Supplement: d0tb02380a1.pdf [file d0tb02380a1.pdf]

## **Electronic Supplementary Information**

### **Antifouling hydrogel coating magnetic nanoparticles for selective isolation and recovery of circulating tumor cells**

Zhili Wang,<sup>a</sup> Zeen Wu,<sup>ab</sup> Na Sun,<sup>a</sup> Yi Cao,<sup>a</sup> Xue Cai,<sup>ab</sup> Feng Yuan,<sup>b</sup> Hanqing Zou,<sup>b</sup> Chungen Xing<sup>b</sup> and Renjun Pei<sup>\*a</sup>

<sup>a</sup>CAS Key Laboratory for Nano-Bio Interface, Suzhou Institute of Nano-Tech and Nano-Bionics, Chinese Academy of Sciences, Suzhou, 215123, China

<sup>b</sup>The Second Affiliated Hospital of Soochow University, Suzhou, 215008, China

\*Corresponding Authors:

E-mail: [rjpei2011@sinano.ac.cn](mailto:rjpei2011@sinano.ac.cn).

Tel: 86-512-62872776.

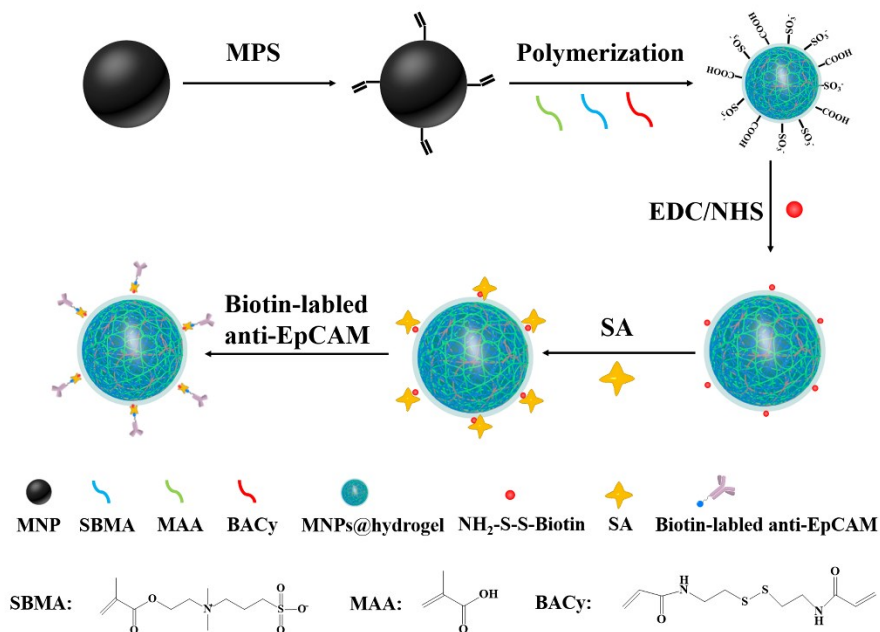

**Fig. S1** Schematic illustration of the preparation of anti-EpCAM antibody modified MNPs@hydrogel.

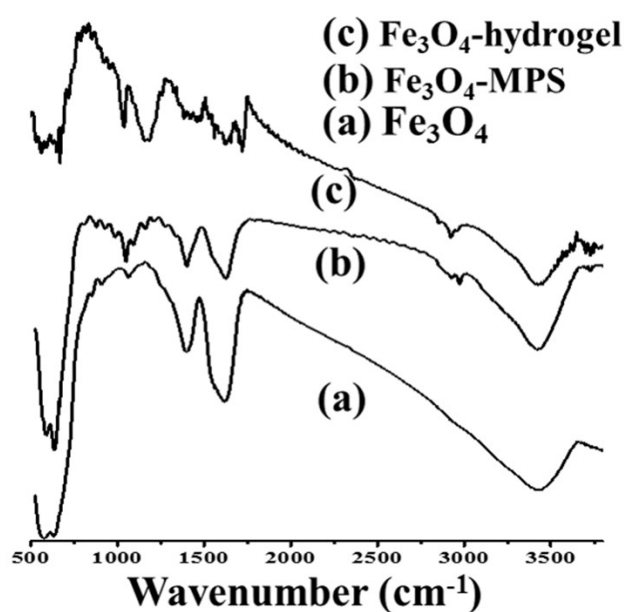

**Fig. S2** FT-IR spectra of MNPs, MNPs-MPS, MNPs@hydrogel. The FTIR spectrum of hydrogel was shown in Figure 2d, displaying the vibrations of C=O (1635 cm<sup>-1</sup>) and N-H (1535 cm<sup>-1</sup>) bands of BACy crosslinker, the C=O stretching vibration (1720cm<sup>-1</sup>) and the O=C-OH stretching vibration (2440 cm<sup>-1</sup>) bands of MAA, and the

O-C=O stretching vibration ( $1720\text{cm}^{-1}$ ) and the  $-\text{SO}_3$  stretching vibration ( $1184\text{cm}^{-1}$ ,  $1039\text{cm}^{-1}$ ) bands of SBMA, which suggested that the hydrogel were successfully modified by BACy crosslinker, SBMA monomer and MAA monomer.

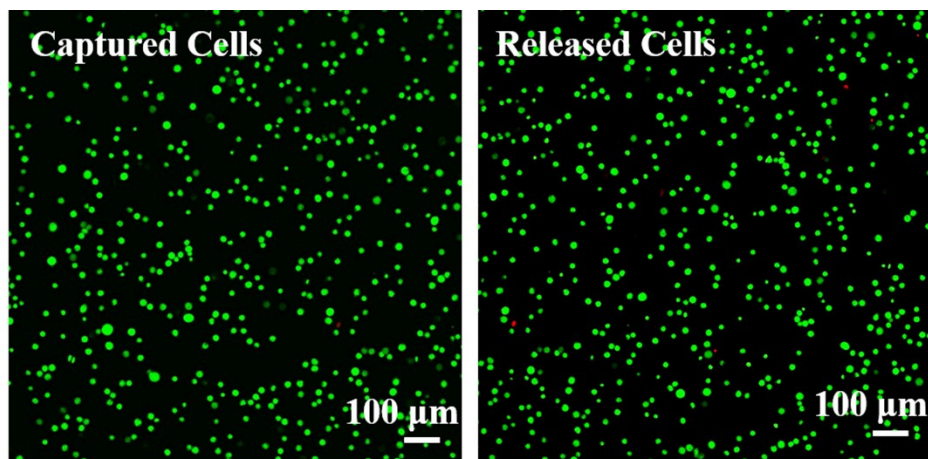

**Fig. S3** Fluorescence imaging of cell viability of captured MCF-7 cells as well as released cells using a live/dead staining (green: live; red: dead). The viability percentages were presented in Figure 3d.

**Table S1.** Clinical information of patients and healthy donors enrolled in this study.

| Sample No. | Gender | Age | Type            | Volume of Blood (mL) | CTCs Number |
|------------|--------|-----|-----------------|----------------------|-------------|
| 1          | Female | 31  | N/A             | 1                    | 0           |
| 2          | Female | 35  | N/A             | 1                    | 0           |
| 3          | Female | 25  | N/A             | 1                    | 0           |
| 4          | Male   | 29  | N/A             | 1                    | 0           |
| 5          | Female | 27  | N/A             | 1                    | 0           |
| 6          | Female | 56  | Breast cancer   | 1                    | 6           |
| 7          | Female | 66  | Breast cancer   | 1                    | 7           |
| 8          | Female | 55  | Breast cancer   | 1                    | 5           |
| 9          | Male   | 85  | Prostate cancer | 1                    | 12          |
| 10         | Male   | 74  | Prostate cancer | 1                    | 1           |
